# Supplementary material for: The miR166d/TaCPK7-D Signaling Module Is a Critical Mediator of Wheat (Triticum aestivum L.) Tolerance to K+ Deficiency
Source: MDPI journal article supplement (doi:10.3390/ijms24097926), 2023-04-27
Supplement: s1 [file s1]

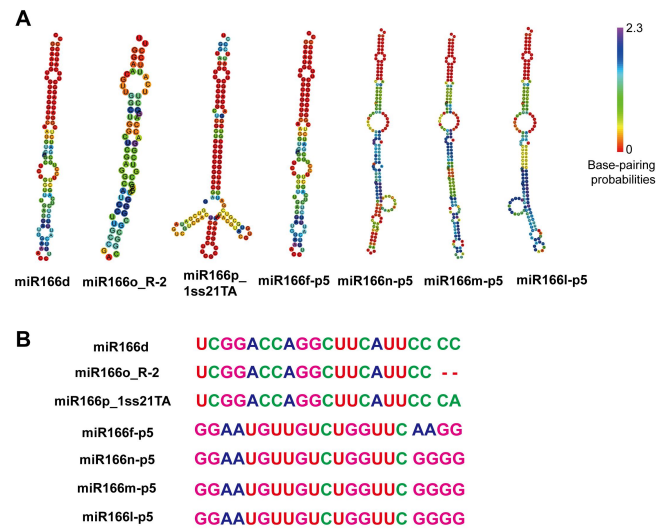

**Figure S1.** The secondary structure (A) and mature sequence (B) of miR166 members responsive to LK ( $10 \mu\text{M K}^+$ ) stress in wheat roots.

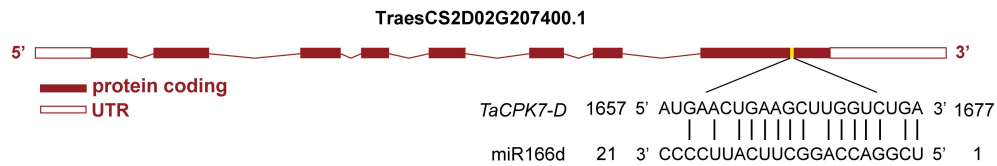

**Figure S2.** Interaction characterization between miR166d and *TaCPK7-D*.

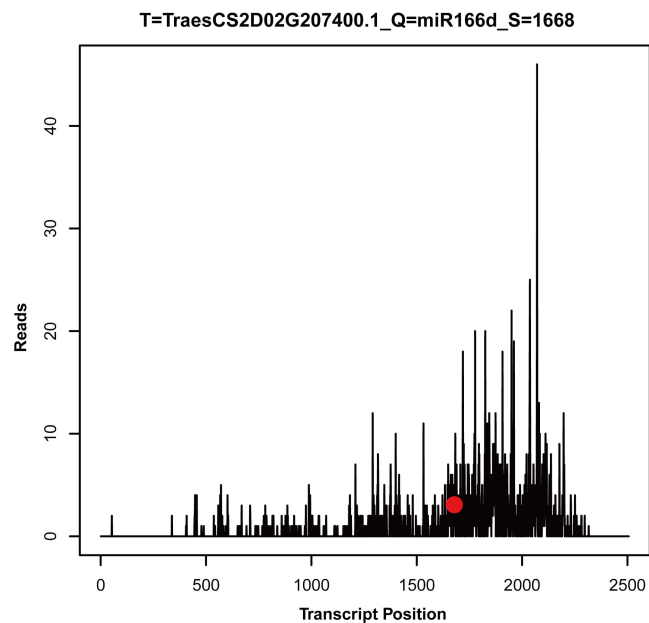

**Figure S3.** Degradome sequencing showing the putative cleavage site on *TaCPK7-D* transcript. The red point indicates the cleavage site.
