# Supplementary material for: The miR166d/TaCPK7-D Signaling Module Is a Critical Mediator of Wheat (Triticum aestivum L.) Tolerance to K+ Deficiency
Source: Int J Mol Sci. 2023 Apr 27;24(9):7926. doi: 10.3390/ijms24097926 (PMC10178733; doi:10.3390/ijms24097926)
Supplement: Supplementary file 1 [file ijms-24-07926-s001.zip › Supplementary_Table S.xls]

## Sheet: Table S1
Table S1 The information of the miR166 members responsive to LK (10 μM K+) stress in wheat roots.
miR_name	miR_seq	len	genomeID	strand	start	end	pre-miRNA_seq	type	Sequence in miRbase	SS	hairpinLen	CG%	dG	MFEI
Tae-miR166d	TCGGACCAGGCTTCATTCCCC	21	Chr1D	+	257227732	257227827	GGAATGTTGTCTGGTTCAAGGtctcgctctggtttgaggatggaaacctttcatttctctcagcttcctgcgatcTCGGACCAGGCTTCATTCCCC	3'	Yes	((((((..(((((((((.(((((..((...((((.((((((((((...))))).)))))..))))....))))))).)))))))))..))))))..	94	51	-38.3	0.8
Tae-miR166n-p5	GGAATGTTGTCTGGCTCGGGG	21	Chr7D	-	497236863	497237016	GGAATGTTGTCTGGCTCGGGGctctctttctttctctctctctatcctcctcccctcgacccctccttgatcagatcgagagaaaggtcgaagatccgatgaggggggagaagagagtagacgtgcgtagatcTCGGACCAGGCTTCATTCCCC	5'	New	((((((..((((((..(((((.(((.......(((((((((((.((((((((...((((((..((((((((...)))))).))..)))))).........))))))))))).))))).))).......))))))))..))))))..))))))..	152	55.2	-65.4	0.8
Tae-miR166m-p5	GGAATGTTGTCTGGCTCGGGG	21	Chr7B	-	527799166	527799321	GGAATGTTGTCTGGCTCGGGGctctctttctttctctctctctctgtgttcctcccctcgatccctccttgatcagatcgagagaaagatcgaagatccgatgaggggggagcagagagtagacgtgcgtagatcTCGGACCAGGCTTCATTCCCC	5'	New	((((((..((((((..(((((...(((.......(((..((((((((..(((.((((((.(((..((.((((((...((....))..)))))).))...)))))))))))))))))))).))).......))))))))..))))))..))))))..	154	54.5	-67.8	0.8
Tae-miR166l-p5	GGAATGTTGTCTGGCTCGGGG	21	Chr7A	-	565070863	565071016	GGAATGTTGTCTGGCTCGGGGctctctttctttctctctctctgtcctcctcccctcgatccctccttgatcggatcgagaggaaggtcgaagatccgatgaggggggagcagagagtagacgtgcgtagatcTCGGACCAGGCTTCATTCCCC	5'	New	((((((..((((((..(((((.(((.......(((..(((((((((((((((((((((((((..........)))))))).))...((((......)))))))))))..)))))))).))).......))))))))..))))))..))))))..	152	57.1	-69.8	0.8
Tae-miR166f-p5	GGAATGTTGTCTGGTTCAAGG	21	Chr1D	+	257227732	257227827	GGAATGTTGTCTGGTTCAAGGtctcgctctggtttgaggatggaaacctttcatttctctcagcttcctgcgatcTCGGACCAGGCTTCATTCCCC	5'	New	((((((..(((((((((.(((((..((...((((.((((((((((...))))).)))))..))))....))))))).)))))))))..))))))..	94	51	-38.3	0.8
Tae-miR166o_R-2	TCGGACCAGGCTTCATTCC	19	Chr6D	+	439684949	439685019	ggaacgttggctggctcgaggcatccttgccgacggcgcgggtcgaggcgTCGGACCAGGCTTCATTCCtt	3'	Diff	((((....((((((..(((.((((((..(((...)))..))))....)).)))..))).)))...))))..	69	66.2	-26.3	0.6
Tae-miR166p_1ss21TA	TCGGACCAGGCTTCATTCCCA	21	Chr6B	+	638235711	638235831	ggtatgttgtctggctcggtgcccccggtcgaggtcgatagtcgtcgactctcccttcgccgggagaaagacgtacgtgtgcgtcgattgatcgggggcgTCGGACCAGGCTTCATTCCCT	3'	Diff	((.(((..((((((..((..((((((((((((.((((((....))))))((((((......))))))..((((((....))))))..))))))))))))..))..))))))..))).))..	119	62	-69.1	0.9

## Sheet: Table S2
Table S2 The degradome sequencing results of miR166d
miR_name	miR_seq	Transcript	Transcript Annotation	GO_Term	KEGG_pathways	KOG_Description	Symbol	Alignment Score	Alignment Range
miR166d	TCGGACCAGGCTTCATTCCCC	TraesCS2D02G207400.1	calcium-dependent protein kise 7-D [Triticum aestivum]	GO:0004683(calmodulin-dependent protein ki-se activity);GO:0005516(calmodulin binding);GO:0005634(nucleus);GO:0005737(cytoplasm);GO:0005886(plasma membrane);GO:0009738(abscisic acid-activated sig-ling pathway);GO:0009931(calcium-dependent protein serine/threonine ki-se activity);GO:0018105(peptidyl-serine phosphorylation);GO:0035556(intracellular sig-l transduction);GO:0046777(protein autophospho…	ko04626(Plant-pathogen interaction)	[T]Sig-l transduction mechanisms	TraesCS2D02G207400	4	1658-1677
miR166d	TCGGACCAGGCTTCATTCCCC	MSTRG.15995.1	-	-	-	[S]Function unknown	-	2.5	597-618
miR166d	TCGGACCAGGCTTCATTCCCC	TraesCS2A02G399900.1	MATE efflux family protein 9 [Triticum urartu]	GO:0006855(drug transmembrane transport);GO:0015238(drug transmembrane transporter activity)	-	[V]Defense mechanisms	TraesCS2A02G399900	3	387-407
miR166d	TCGGACCAGGCTTCATTCCCC	TraesCS2B02G417900.1	MATE efflux family protein 9 [Triticum urartu]	GO:0006855(drug transmembrane transport);GO:0015238(drug transmembrane transporter activity)	-	[V]Defense mechanisms	TraesCS2B02G417900	3	375-395
miR166d	TCGGACCAGGCTTCATTCCCC	TraesCS2D02G397500.1	MATE efflux family protein 9 [Triticum urartu]	GO:0006855(drug transmembrane transport);GO:0015238(drug transmembrane transporter activity)	-	[V]Defense mechanisms	TraesCS2D02G397500	3	257-277
miR166d	TCGGACCAGGCTTCATTCCCC	TraesCS5D02G385300.1	Homeobox-leucine zipper protein HOX32 [Aegilops tauschii]	GO:0003677(D- binding);GO:0003700(transcription factor activity, sequence-specific D- binding);GO:0005634(nucleus);GO:0006351(transcription, D--templated);GO:0006355(regulation of transcription, D--templated);GO:0008289(lipid binding);GO:0009855(determi-tion of bilateral symmetry);GO:0009944(polarity specification of adaxial/abaxial axis);GO:0009955(adaxial/abaxial pattern specification);GO:00100…	-	[K]Transcription	TraesCS5D02G385300	3	879-899
miR166d	TCGGACCAGGCTTCATTCCCC	TraesCS5B02G378000.1	Homeobox-leucine zipper protein HOX32 [Aegilops tauschii]	GO:0003677(D- binding);GO:0003700(transcription factor activity, sequence-specific D- binding);GO:0005634(nucleus);GO:0006351(transcription, D--templated);GO:0006355(regulation of transcription, D--templated);GO:0008289(lipid binding);GO:0009855(determi-tion of bilateral symmetry);GO:0009944(polarity specification of adaxial/abaxial axis);GO:0009955(adaxial/abaxial pattern specification);GO:00100…	-	[K]Transcription	TraesCS5B02G378000	3	779-799
miR166d	TCGGACCAGGCTTCATTCCCC	TraesCS5A02G043400.1	predicted protein [Hordeum vulgare subsp- vulgare]	GO:0003677(D- binding);GO:0003700(transcription factor activity, sequence-specific D- binding);GO:0005634(nucleus);GO:0006351(transcription, D--templated);GO:0006355(regulation of transcription, D--templated);GO:0008289(lipid binding);GO:0009855(determi-tion of bilateral symmetry);GO:0009944(polarity specification of adaxial/abaxial axis);GO:0009955(adaxial/abaxial pattern specification);GO:00100…	-	[K]Transcription	TraesCS5A02G043400	1.5	778-798
miR166d	TCGGACCAGGCTTCATTCCCC	TraesCS5B02G047200.1	predicted protein [Hordeum vulgare subsp- vulgare]	GO:0003677(D- binding);GO:0003700(transcription factor activity, sequence-specific D- binding);GO:0005634(nucleus);GO:0006351(transcription, D--templated);GO:0006355(regulation of transcription, D--templated);GO:0008289(lipid binding);GO:0009855(determi-tion of bilateral symmetry);GO:0009944(polarity specification of adaxial/abaxial axis);GO:0009955(adaxial/abaxial pattern specification);GO:00100…	-	[K]Transcription	TraesCS5B02G047200	1.5	766-786
miR166d	TCGGACCAGGCTTCATTCCCC	TraesCS5D02G052300.1	predicted protein [Hordeum vulgare subsp- vulgare]	GO:0003677(D- binding);GO:0003700(transcription factor activity, sequence-specific D- binding);GO:0005634(nucleus);GO:0006351(transcription, D--templated);GO:0006355(regulation of transcription, D--templated);GO:0008289(lipid binding);GO:0009855(determi-tion of bilateral symmetry);GO:0009944(polarity specification of adaxial/abaxial axis);GO:0009955(adaxial/abaxial pattern specification);GO:00100…	-	[K]Transcription	TraesCS5D02G052300	1.5	677-697
miR166d	TCGGACCAGGCTTCATTCCCC	TraesCS5A02G549700.1	Homeobox-leucine zipper protein HOX10 [Aegilops tauschii]	GO:0003677(D- binding);GO:0003700(transcription factor activity, sequence-specific D- binding);GO:0005634(nucleus);GO:0006351(transcription, D--templated);GO:0006355(regulation of transcription, D--templated);GO:0008289(lipid binding);GO:0009855(determi-tion of bilateral symmetry);GO:0009944(polarity specification of adaxial/abaxial axis);GO:0009956(radial pattern formation);GO:0010014(meristem i…	-	[K]Transcription	TraesCS5A02G549700	3	941-961
miR166d	TCGGACCAGGCTTCATTCCCC	TraesCS5A02G549700.2	Homeobox-leucine zipper protein HOX10 [Aegilops tauschii]	GO:0003677(D- binding);GO:0003700(transcription factor activity, sequence-specific D- binding);GO:0005634(nucleus);GO:0006351(transcription, D--templated);GO:0006355(regulation of transcription, D--templated);GO:0008289(lipid binding);GO:0009855(determi-tion of bilateral symmetry);GO:0009944(polarity specification of adaxial/abaxial axis);GO:0009956(radial pattern formation);GO:0010014(meristem i…	-	[K]Transcription	TraesCS5A02G549700	3	960-980
miR166d	TCGGACCAGGCTTCATTCCCC	MSTRG.42839.3	-	-	-	[K]Transcription	TraesCS5A02G549700	3	701-721
miR166d	TCGGACCAGGCTTCATTCCCC	TraesCS1A02G157500.1	predicted protein [Hordeum vulgare subsp- vulgare]	GO:0003677(D- binding);GO:0003700(transcription factor activity, sequence-specific D- binding);GO:0005634(nucleus);GO:0006351(transcription, D--templated);GO:0006355(regulation of transcription, D--templated);GO:0008289(lipid binding);GO:0009855(determi-tion of bilateral symmetry);GO:0009944(polarity specification of adaxial/abaxial axis);GO:0009956(radial pattern formation);GO:0010014(meristem i…	-	[K]Transcription	TraesCS1A02G157500	3	1104-1124
miR166d	TCGGACCAGGCTTCATTCCCC	TraesCS1D02G155200.2	predicted protein [Hordeum vulgare subsp- vulgare]	GO:0003677(D- binding);GO:0003700(transcription factor activity, sequence-specific D- binding);GO:0005634(nucleus);GO:0006351(transcription, D--templated);GO:0006355(regulation of transcription, D--templated);GO:0008289(lipid binding);GO:0009855(determi-tion of bilateral symmetry);GO:0009944(polarity specification of adaxial/abaxial axis);GO:0009956(radial pattern formation);GO:0010014(meristem i…	-	[K]Transcription	TraesCS1D02G155200	3	1066-1086
miR166d	TCGGACCAGGCTTCATTCCCC	TraesCS1D02G155200.1	predicted protein [Hordeum vulgare subsp- vulgare]	GO:0003677(D- binding);GO:0003700(transcription factor activity, sequence-specific D- binding);GO:0005634(nucleus);GO:0006351(transcription, D--templated);GO:0006355(regulation of transcription, D--templated);GO:0008289(lipid binding);GO:0009855(determi-tion of bilateral symmetry);GO:0009944(polarity specification of adaxial/abaxial axis);GO:0009956(radial pattern formation);GO:0010014(meristem i…	-	[K]Transcription	TraesCS1D02G155200	3	1066-1086
miR166d	TCGGACCAGGCTTCATTCCCC	TraesCS1B02G173900.1	predicted protein [Hordeum vulgare subsp- vulgare]	GO:0003677(D- binding);GO:0003700(transcription factor activity, sequence-specific D- binding);GO:0005634(nucleus);GO:0006351(transcription, D--templated);GO:0006355(regulation of transcription, D--templated);GO:0008289(lipid binding);GO:0009855(determi-tion of bilateral symmetry);GO:0009944(polarity specification of adaxial/abaxial axis);GO:0009956(radial pattern formation);GO:0010014(meristem i…	-	[K]Transcription	TraesCS1B02G173900	3	1138-1158
miR166d	TCGGACCAGGCTTCATTCCCC	TraesCS1D02G155200.3	predicted protein [Hordeum vulgare subsp- vulgare]	GO:0003677(D- binding);GO:0003700(transcription factor activity, sequence-specific D- binding);GO:0005634(nucleus);GO:0006351(transcription, D--templated);GO:0006355(regulation of transcription, D--templated);GO:0008289(lipid binding);GO:0009855(determi-tion of bilateral symmetry);GO:0009944(polarity specification of adaxial/abaxial axis);GO:0009956(radial pattern formation);GO:0010014(meristem i…	-	[K]Transcription	TraesCS1D02G155200	3	1066-1086
miR166d	TCGGACCAGGCTTCATTCCCC	TraesCS4B02G385200.1	Homeobox-leucine zipper protein HOX10 [Aegilops tauschii]	GO:0003677(D- binding);GO:0003700(transcription factor activity, sequence-specific D- binding);GO:0005634(nucleus);GO:0006351(transcription, D--templated);GO:0006355(regulation of transcription, D--templated);GO:0008289(lipid binding);GO:0009855(determi-tion of bilateral symmetry);GO:0009944(polarity specification of adaxial/abaxial axis);GO:0009956(radial pattern formation);GO:0010014(meristem i…	-	[K]Transcription	TraesCS4B02G385200	3	894-914
miR166d	TCGGACCAGGCTTCATTCCCC	MSTRG.39364.1	-	-	-	[K]Transcription	TraesCS4D02G359600	3	1034-1054
miR166d	TCGGACCAGGCTTCATTCCCC	TraesCS4D02G359600.1	Homeobox-leucine zipper protein HOX10 [Aegilops tauschii]	GO:0003677(D- binding);GO:0003700(transcription factor activity, sequence-specific D- binding);GO:0005634(nucleus);GO:0006351(transcription, D--templated);GO:0006355(regulation of transcription, D--templated);GO:0008289(lipid binding);GO:0009855(determi-tion of bilateral symmetry);GO:0009944(polarity specification of adaxial/abaxial axis);GO:0009956(radial pattern formation);GO:0010014(meristem i…	-	[K]Transcription	TraesCS4D02G359600	3	978-998
miR166d	TCGGACCAGGCTTCATTCCCC	TraesCS3D02G119500.1	un-med protein product [Triticum aestivum]	GO:0003674(molecular_function);GO:0005575(cellular_component);GO:0008150(biological_process)	-	[S]Function unknown	TraesCS3D02G119500	3.5	627-648
miR166d	TCGGACCAGGCTTCATTCCCC	TraesCS3B02G137000.1	un-med protein product [Triticum aestivum]	GO:0003674(molecular_function);GO:0005575(cellular_component);GO:0008150(biological_process)	-	[S]Function unknown	TraesCS3B02G137000	3.5	530-551
miR166d	TCGGACCAGGCTTCATTCCCC	TraesCS5A02G375800.1	Homeobox-leucine zipper protein HOX32 [Aegilops tauschii]	GO:0003677(D- binding);GO:0003700(transcription factor activity, sequence-specific D- binding);GO:0005634(nucleus);GO:0006351(transcription, D--templated);GO:0006355(regulation of transcription, D--templated);GO:0008289(lipid binding);GO:0009855(determi-tion of bilateral symmetry);GO:0009944(polarity specification of adaxial/abaxial axis);GO:0009955(adaxial/abaxial pattern specification);GO:00100…	-	[K]Transcription	TraesCS5A02G375800	3	920-940
miR166d	TCGGACCAGGCTTCATTCCCC	MSTRG.41802.2	-	-	-	[K]Transcription	TraesCS5A02G375800	3	908-928
miR166d	TCGGACCAGGCTTCATTCCCC	TraesCS3B02G159100.2	un-med protein product [Triticum aestivum]	GO:0003677(D- binding);GO:0003700(transcription factor activity, sequence-specific D- binding);GO:0005634(nucleus);GO:0006351(transcription, D--templated);GO:0006355(regulation of transcription, D--templated);GO:0008289(lipid binding);GO:0009855(determi-tion of bilateral symmetry);GO:0009887(organ morphogenesis);GO:0009965(leaf morphogenesis);GO:0010014(meristem initiation);GO:0010073(meristem ma…	-	[K]Transcription	TraesCS3B02G159100	3	933-953
miR166d	TCGGACCAGGCTTCATTCCCC	TraesCS3A02G312800.1	un-med protein product [Triticum aestivum]	GO:0003677(D- binding);GO:0003700(transcription factor activity, sequence-specific D- binding);GO:0005634(nucleus);GO:0006351(transcription, D--templated);GO:0006355(regulation of transcription, D--templated);GO:0008289(lipid binding);GO:0009855(determi-tion of bilateral symmetry);GO:0009887(organ morphogenesis);GO:0009965(leaf morphogenesis);GO:0010014(meristem initiation);GO:0010073(meristem ma…	-	[K]Transcription	TraesCS3A02G312800	3	749-769
miR166d	TCGGACCAGGCTTCATTCCCC	TraesCS3A02G312800.2	un-med protein product [Triticum aestivum]	GO:0003677(D- binding);GO:0003700(transcription factor activity, sequence-specific D- binding);GO:0005634(nucleus);GO:0006351(transcription, D--templated);GO:0006355(regulation of transcription, D--templated);GO:0008289(lipid binding);GO:0009855(determi-tion of bilateral symmetry);GO:0009887(organ morphogenesis);GO:0009965(leaf morphogenesis);GO:0010014(meristem initiation);GO:0010073(meristem ma…	-	[K]Transcription	TraesCS3A02G312800	3	1150-1170
miR166d	TCGGACCAGGCTTCATTCCCC	TraesCS3D02G141500.2	un-med protein product [Triticum aestivum]	GO:0003677(D- binding);GO:0003700(transcription factor activity, sequence-specific D- binding);GO:0005634(nucleus);GO:0006351(transcription, D--templated);GO:0006355(regulation of transcription, D--templated);GO:0008289(lipid binding);GO:0009855(determi-tion of bilateral symmetry);GO:0009887(organ morphogenesis);GO:0009965(leaf morphogenesis);GO:0010014(meristem initiation);GO:0010073(meristem ma…	-	[K]Transcription	TraesCS3D02G141500	3	956-976
miR166d	TCGGACCAGGCTTCATTCCCC	MSTRG.22565.1	-	-	-	[K]Transcription	TraesCS3A02G312800	3	5126-5146
miR166d	TCGGACCAGGCTTCATTCCCC	TraesCS3B02G159100.1	un-med protein product [Triticum aestivum]	GO:0003677(D- binding);GO:0003700(transcription factor activity, sequence-specific D- binding);GO:0005634(nucleus);GO:0006351(transcription, D--templated);GO:0006355(regulation of transcription, D--templated);GO:0008289(lipid binding);GO:0009855(determi-tion of bilateral symmetry);GO:0009887(organ morphogenesis);GO:0009965(leaf morphogenesis);GO:0010014(meristem initiation);GO:0010073(meristem ma…	-	[K]Transcription	TraesCS3B02G159100	3	923-943
miR166d	TCGGACCAGGCTTCATTCCCC	MSTRG.28208.3	-	-	-	[K]Transcription	TraesCS3D02G141500	3	954-974
miR166d	TCGGACCAGGCTTCATTCCCC	TraesCS3D02G141500.1	un-med protein product [Triticum aestivum]	GO:0003677(D- binding);GO:0003700(transcription factor activity, sequence-specific D- binding);GO:0005634(nucleus);GO:0006351(transcription, D--templated);GO:0006355(regulation of transcription, D--templated);GO:0008289(lipid binding);GO:0009855(determi-tion of bilateral symmetry);GO:0009887(organ morphogenesis);GO:0009965(leaf morphogenesis);GO:0010014(meristem initiation);GO:0010073(meristem ma…	-	[K]Transcription	TraesCS3D02G141500	3	845-865

## Sheet: Table S3
Table S3 All primers used in this study
usage	primer names	primer sequences (5' - 3')
miR166d and TaCPK7-D function	miR166d-cloning	Forward	CCATGGTAGATCTGACTAGTGGAATGTTGTCTGGTTCAAGG
		Reverse	AAGTTCTTCTCCTTTACTAGTGGGGAATGAAGCCTGGTCCGA
	miR166d-VIGS	Forward	CCGTTGCTAGCTGAGCGGCCGCGGGGAATGAAGctaCCTGGTCCGAgttgttgttgtt
		Reverse	TTAATTAACCCGGGGCGGCCGCTCGGACCAGGtagCTTCATTCCCCattcttcttctt
	miR166d-62SK	Forward	CGCGGTGGCGGCCGCTCTAGAGTAATCATTCACACATCATG
		Reverse	TTCCTGCAGCCCGGGGGATCCAAATGGTTCAGAAGAATAAA
	TaCPK7-D-VIGS	Forward	CCGTTGCTAGCTGAGCGGCCGCGGTCACCAAGACCATCGTCG
		Reverse	TTAATTAACCCGGGGCGGCCGCCCTCTTGGCCATAGTTTCTCT
	TaCPK7-D-LUC	Forward	CCGTGTAATTCTAGAGCGGCCGC TGTCAATTTGGGTGAGACAG
		Reverse	TTCACTAGTGGATCCGCGGCCGC TCAATATATCCACTCTTGTTC
RT-qPCR	TaGAPDH (TraesCS6B02G243700.1)	Forward	TAAGGGTGGTGCCAAGAAGGT
		Reverse	AGCAAGAGGAGCAAGGCAGTT
	AtTUB (AT5G62690.1)	Forward	GAGCCTTACAACGCTACTCTGTCTGTC
		Reverse	ACACCAGACATAGTAGCAGAAATCAAG
	miR166d	Forward	GCGTCGGACCAGGCTTCA
		Reverse	AGTGCAGGGTCCGAGGTATT
	TaCPK7-D (TraesCS2D02G207400.1)	Forward	CTTTGATCGGAACAAGAGTGG
		Reverse	GGATGATGGCATTGATAACCT
	TaAKT1 (TraesCS3A02G233800.1)	Forward	CTACGACCGCCGATACAG
		Reverse	AGCATAACGCCAAGCAAT
	TaKAT1 (TraesCS6A02G160500.1)	Forward	GATGGGCTTCACATAAACG
		Reverse	CAGGCGGAATAAACAACT
	TaKAT2 (TraesCS3D02G148600.1)	Forward	CATTTATTCCTCCCTGTCC
		Reverse	CCATCAATCATTATCCGTTC
	TaHAK1 (TraesCS4A02G410200.1)	Forward	GTTGTACAACCTCGTCGTT
		Reverse	GCCGTTGAAGCTGATCTG
	TaHAK5 (TraesCS3D02G439200.1)	Forward	TTGATAATCTATACTGTACTTCTCC
		Reverse	CGTAGGGGACTCTAACTTG
